# Supplementary material for: Recyclable calix[4]arene–lanthanoid luminescent hybrid materials with color-tuning and color-switching properties
Source: Royal Society of Chemistry journal article supplement (doi:10.1039/c3dt33059a), 2013-01-01
Supplement: c3dt33059a.pdf [file c3dt33059a.pdf]

**Recyclable Calix[4]arene-Lanthanoid Luminescent Hybrid Materials with  
Color-Tuning and Color-Switching Properties**

Brendan W. Ennis, Sara Muzzioli, Brodie L. Reid, Daniel M. D'Alessio, Stefano Stagni, David H. Brown, Mark I. Ogden, Massimiliano Massi

**Supplementary Information**

### Excitation and emission spectra from solutions of **1H** and single lanthanoid salts

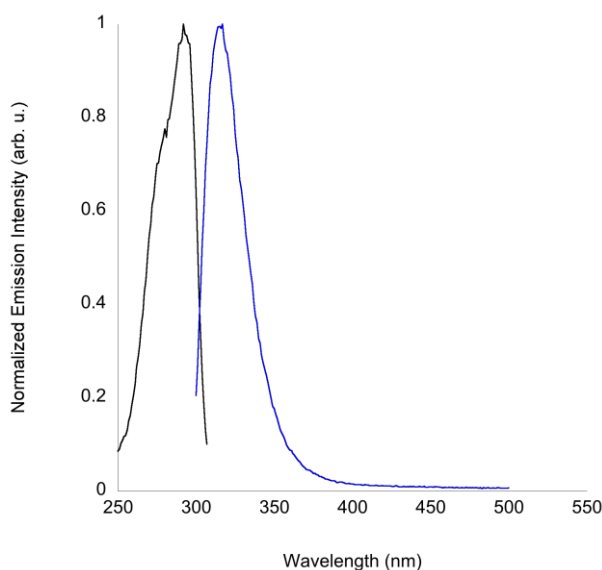

**Figure S1.** Excitation and emission spectra for a ca.  $10^{-5}$  M solution of **1H** in dichloromethane/ethanol (1:1).

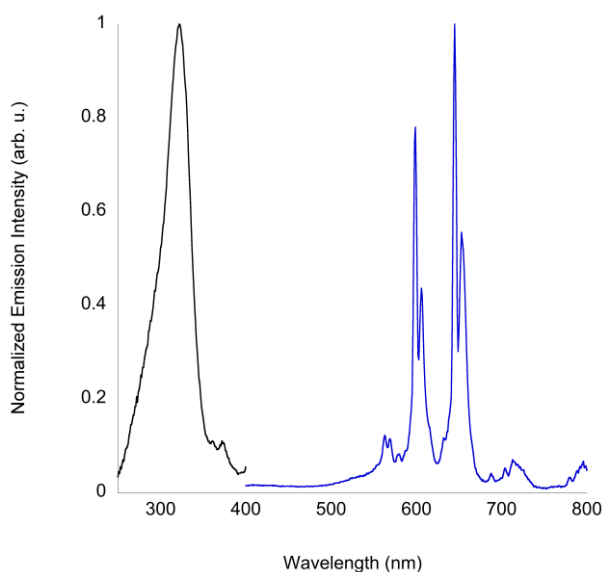

**Figure S2.** Excitation and emission spectra for a ca.  $10^{-5}$  M solution of **1H** and  $[\text{Sm}(\text{NO}_3)_3(\text{DMSO})_n]$  (1:1) in dichloromethane/ethanol (1:1).

The excitation and emission profiles for an equimolar amount of **1H** and  $[\text{Tb}(\text{NO}_3)_3(\text{DMSO})_n]$  have already been reported (see ref. 20 in the manuscript). On the other hand, the solutions containing equimolar amounts of **1H** and  $[\text{Tm}(\text{NO}_3)_3(\text{DMSO})_n]$  or **1H** and  $[\text{Gd}(\text{NO}_3)_3(\text{DMSO})_n]$  display extremely weak emissions at room temperature.
